# Supplementary material for: Filaggrin and filaggrin 2 processing are linked together through skin aspartic acid protease activation
Source: PubMed Central journal article supplement (PMC7241785; doi:10.1371/journal.pone.0232679), 2020-05-21
Supplement: pone.0232679.s006.pdf [file pone.0232679.s006.pdf]

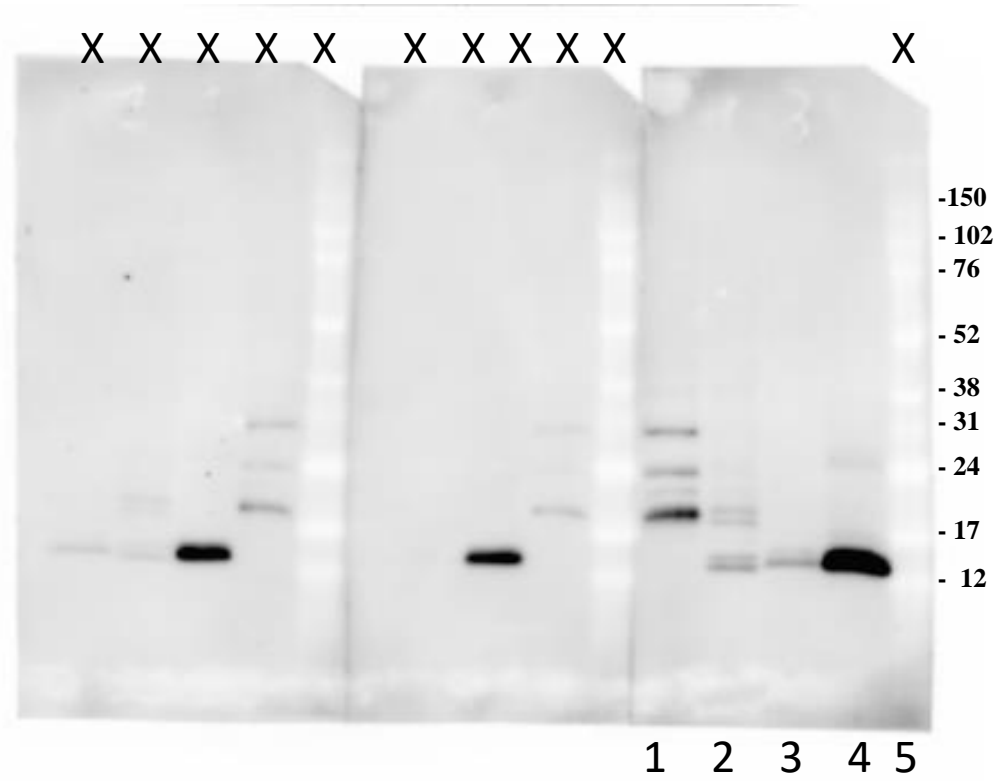

Figure 4 A

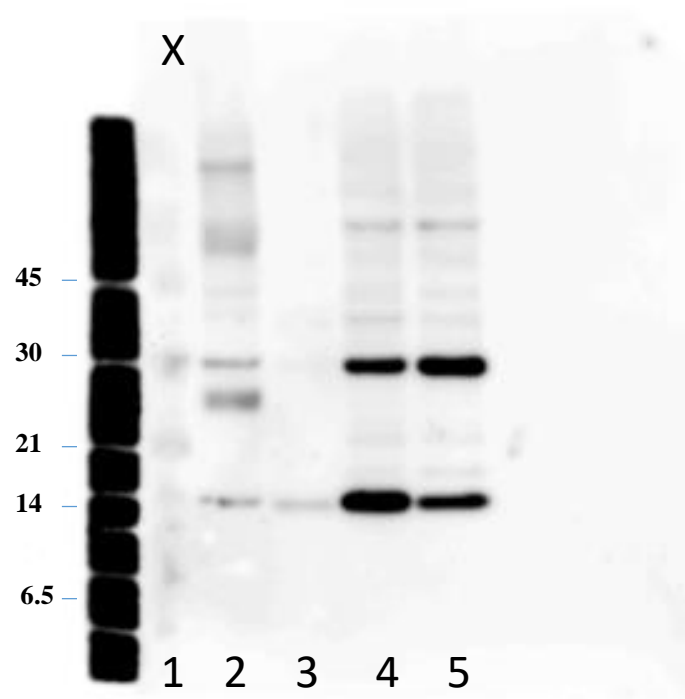

Figure 4 B

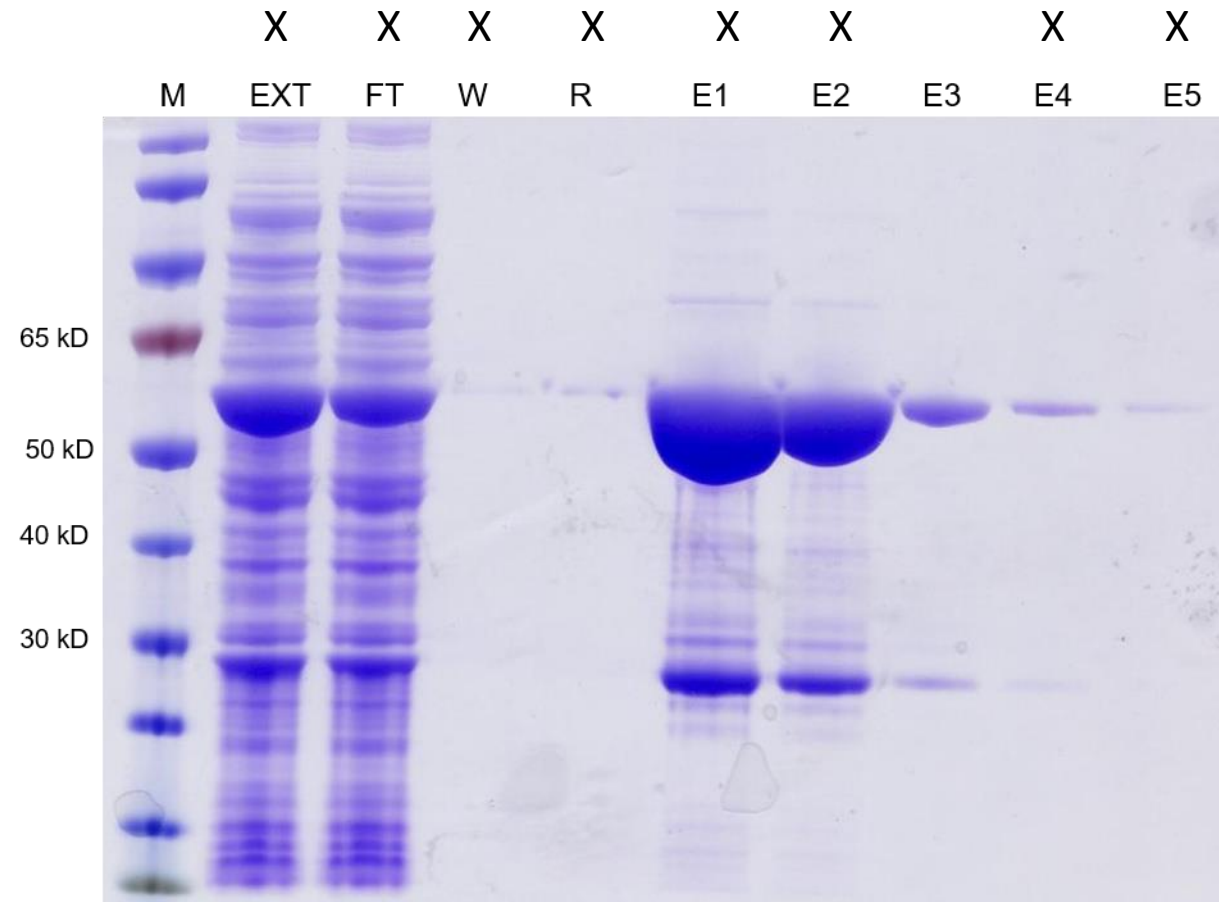

S1 Figure A

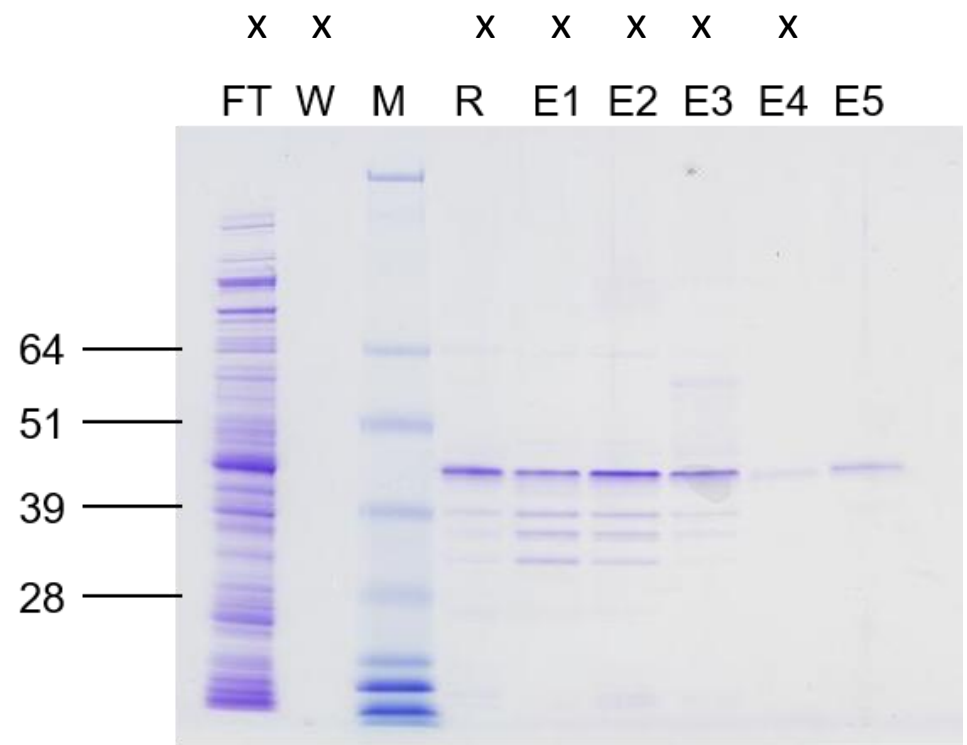

S1 Figure B

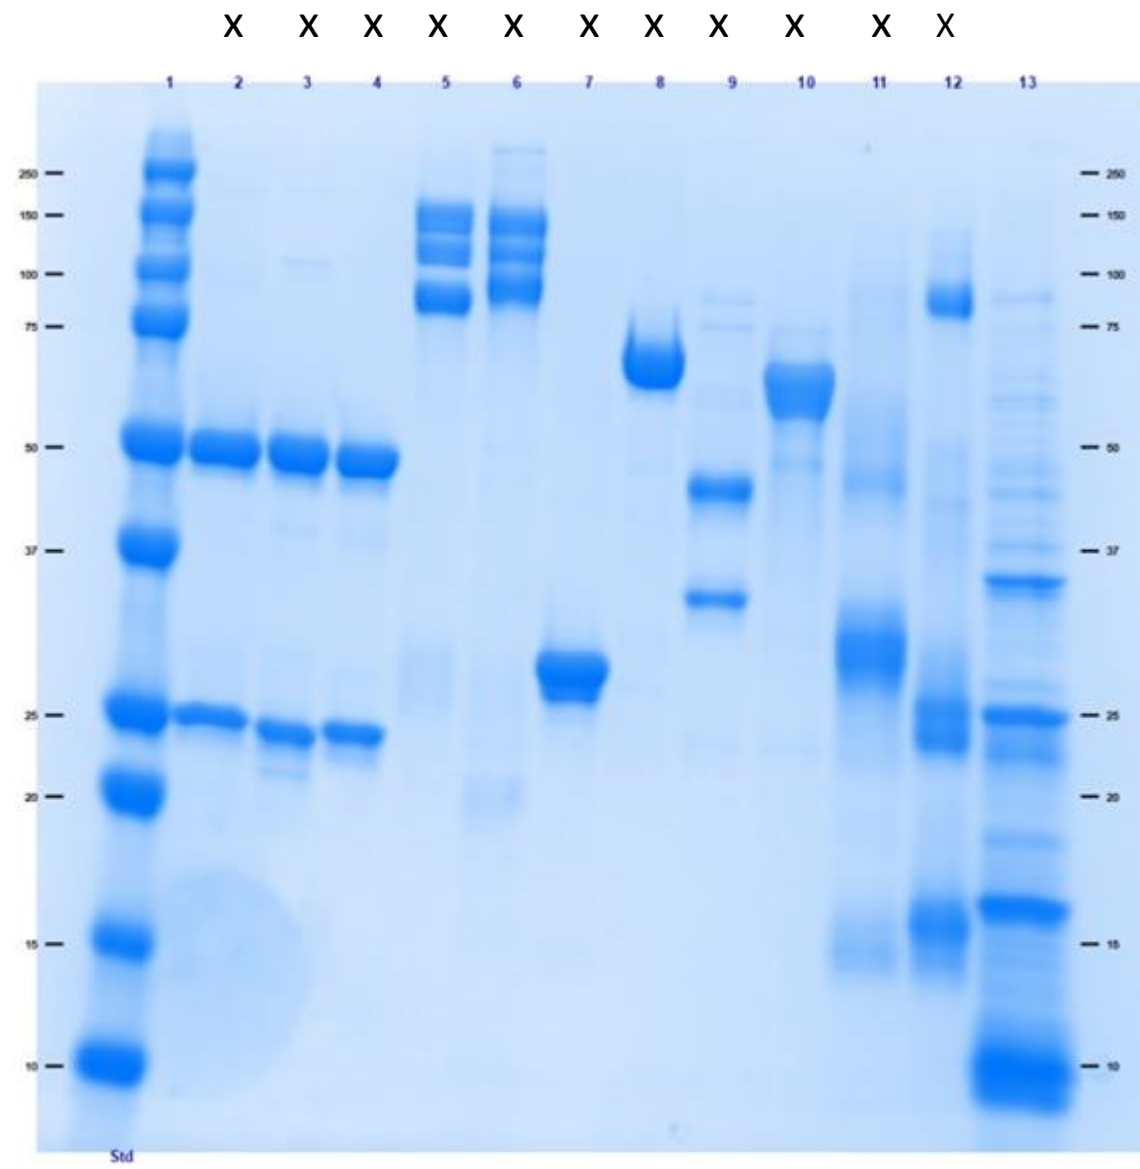

S1 Figure C

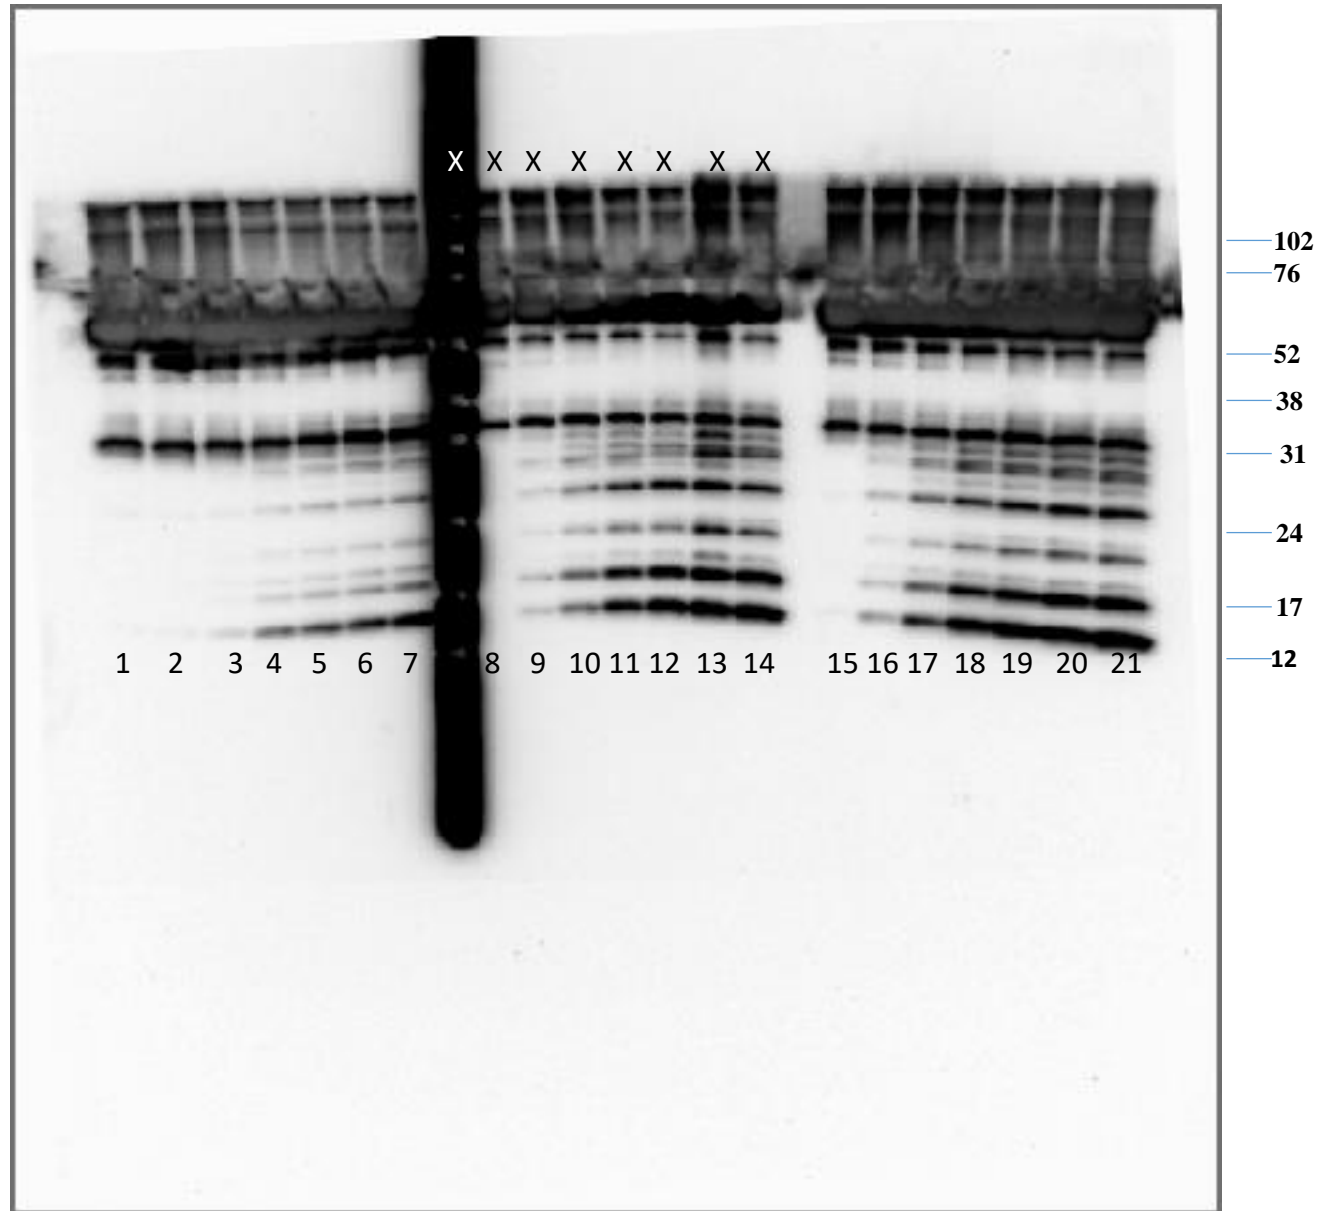

S5 Figure
